# Supplementary material for: PRPF19 mediates the proteasomal degradation of VDR to exacerbate ferroptosis in diabetic nephropathy
Source: Research Square preprint supplement (doi:10.21203/rs.3.rs-6083539/v1), 2025-05-06
Supplement: Supplementary file 1 [file 330b312f9a36cf37b9148869.pdf]

# Supplementary Material

## PRPF19 mediates the proteasomal degradation of VDR to exacerbate ferroptosis in diabetic nephropathy

Qiongyao He<sup>1,5</sup>, Wu He<sup>2</sup>, Yanlin Ren<sup>3</sup>, Wenbin Wu<sup>1</sup>, Hui Dong<sup>4</sup>, Gang Yuan<sup>5</sup>, Huihui Ren<sup>5</sup>, Xinwei Wang<sup>6</sup>, Fuer Lu<sup>4\*</sup>, Dingkun Wang<sup>4\*</sup>

<sup>1</sup>*Institute of Integrated Traditional Chinese and Western Medicine, Tongji Hospital, Tongji Medical College, Huazhong University of Science and Technology, Wuhan 430030, China*

<sup>2</sup>*Division of Cardiology, Department of Internal Medicine and Hubei Key Laboratory of Genetics and Molecular Mechanism of Cardiologic Disorders, Tongji Hospital, Tongji Medical College, Huazhong University of Science and Technology, Wuhan, 430000, China*

<sup>3</sup>*Department of Traditional Chinese Medicine, Zhongshan Hospital of Hubei Province, Wuhan 430030, China*

<sup>4</sup>*Department of Integrated Traditional Chinese and Western Medicine, Tongji Medical College, Tongji Hospital, Huazhong University of Science and Technology, Wuhan 430030, China*

<sup>5</sup>*Department of Endocrinology, Department of Internal Medicine, Tongji Hospital, Tongji Medical College, Huazhong University of Science and Technology, Wuhan 430030, China*

<sup>6</sup>*College of Pharmacy, Hubei University of Chinese Medicine, Wuhan 430065, China*

24    **\*To whom correspondence should be addressed:**

25    Dr Fuer Lu, Department of Integrated Traditional Chinese and Western Medicine,  
26    Tongji Medical College, Tongji Hospital, Huazhong University of Science and  
27    Technology, Wuhan 430030, China, Email: felutjh88@163.com

28    Dr Dingkun Wang, Department of Integrated Traditional Chinese and Western  
29    Medicine, Tongji Medical College, Tongji Hospital, Huazhong University of Science  
30    and Technology, Wuhan 430030, China, Email: wdkung@163.com;

31

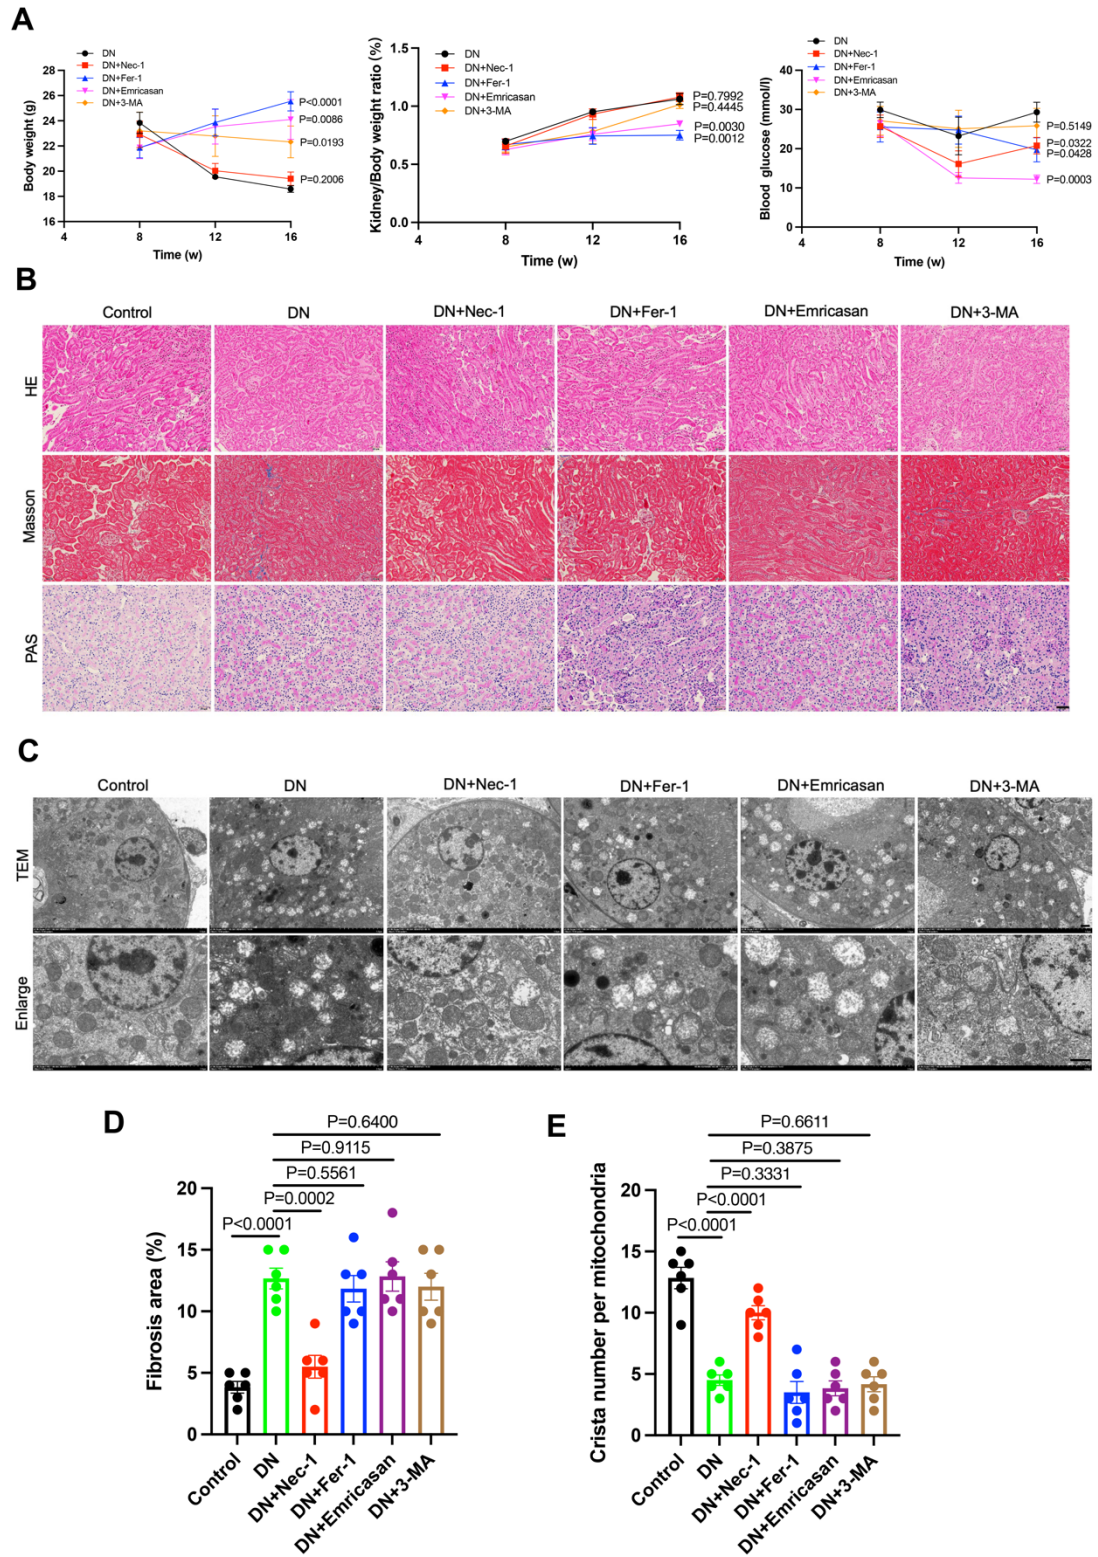

32  
33

**Fig S1. Necrosis is the predominant form of cell death in the early-stage of DN.**

(A) Levels of body weight, kidney/body weight ratio and blood glucose in DN mice treated with Nec-1 (5 mg·kg<sup>-1</sup>·d<sup>-1</sup>), Fer-1 (5 mg·kg<sup>-1</sup>·d<sup>-1</sup>), Emricasan (12.5 mg·kg<sup>-1</sup>·d<sup>-1</sup>), 3-MA (10 mg·kg<sup>-1</sup>·d<sup>-1</sup>), or vehicle (n = 5 or 6). (B) H&E, Masson and PAS staining of kidney sections collected from mice in the indicated groups at week 8 (bar = 100 μm). (C) Representative transmission electron microscopy images of PTECs from mice in the indicated groups at week 8 (bar = 10 μm). (D) Quantification of tubulointerstitial fibrosis in the kidney cortex at week 8. (E) Absolute counting of the number of cristae per mitochondria at week 8. Data are expressed as means ± SEM. Student's t-test was employed for comparisons between two groups; one-way ANOVA followed by Tukey's post-test for multiple comparisons was used for groups of three or more.



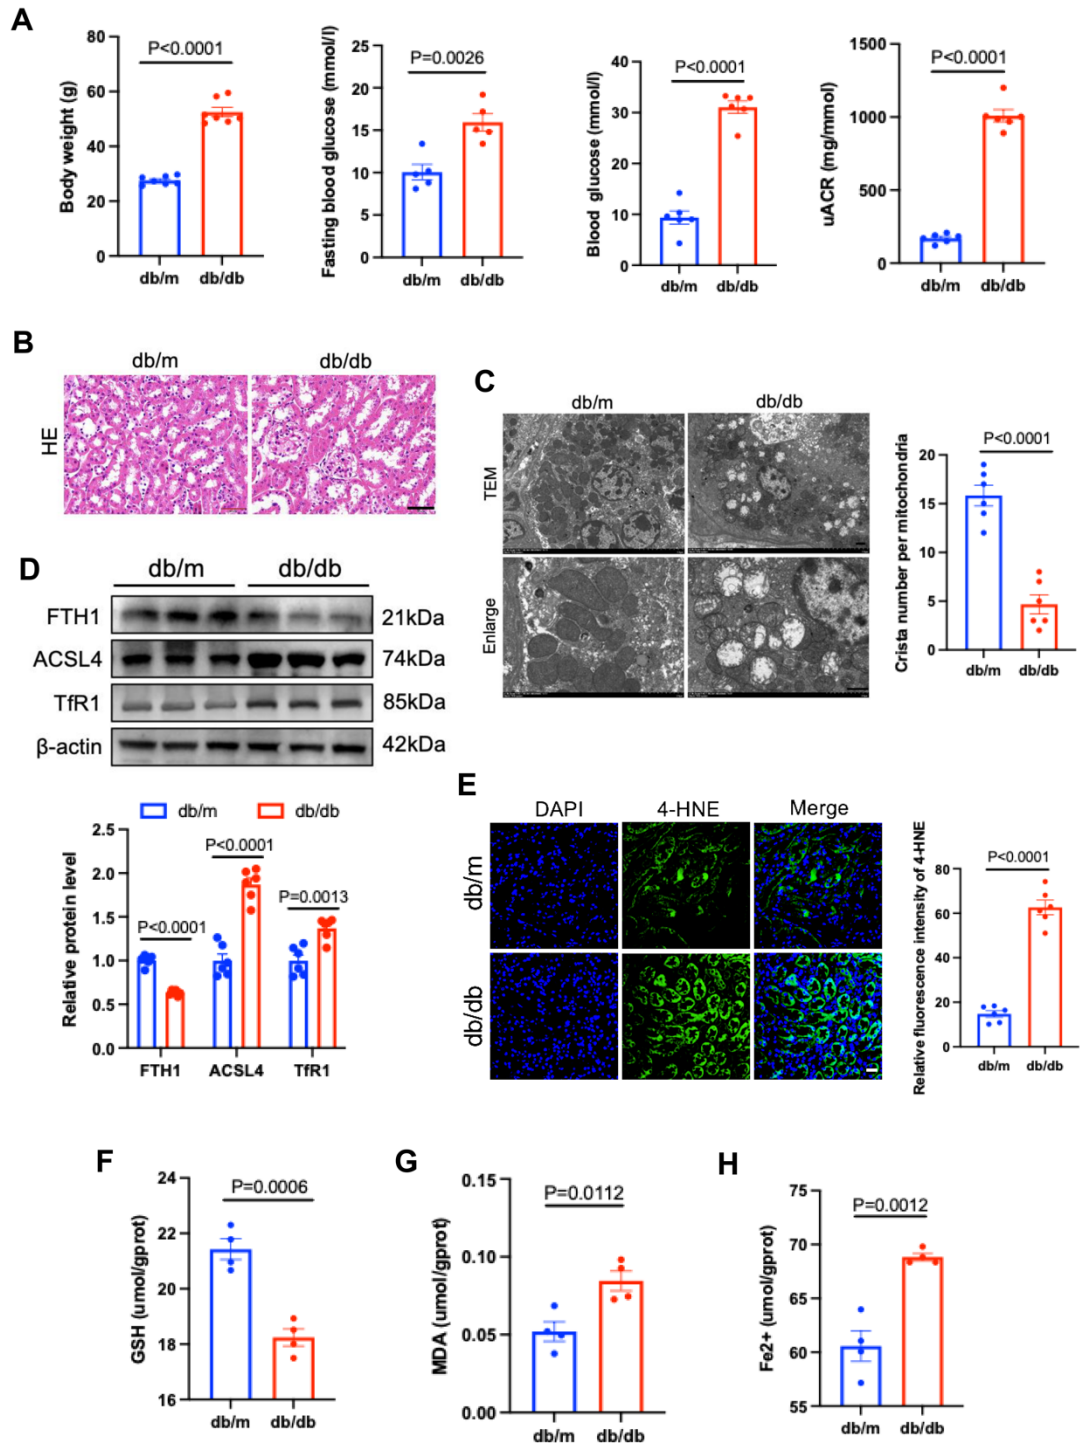

47

48

49

**Fig S2. Ferroptosis in renal tubular cells of db/db mice.**

(A) Levels of body weight, fasting blood glucose, blood glucose and uACR in db/db or db/m mice (n = 5-7). (B) H&E staining of kidney sections collected from db/db or db/m mice (bar = 50  $\mu$ m). (C) Representative transmission electron microscopy images of PTECs from db/db or db/m mice (bar = 10  $\mu$ m). (D) Western blotting of FTH1, ACSL4 and TfR1 in the kidney tissues of db/db or db/m mice (n = 6). (E) Immunofluorescence staining of 4-HNE of PTECs from db/db or db/m mice (n = 6; bar = 50  $\mu$ m). (F-H) GSH, MDA and iron levels of db/db or db/m mice (n = 4). Data are expressed as means  $\pm$  SEM. Student's t-test was employed for comparisons between two groups; one-way ANOVA followed by Tukey's post-test for multiple comparisons was used for groups of three or more.

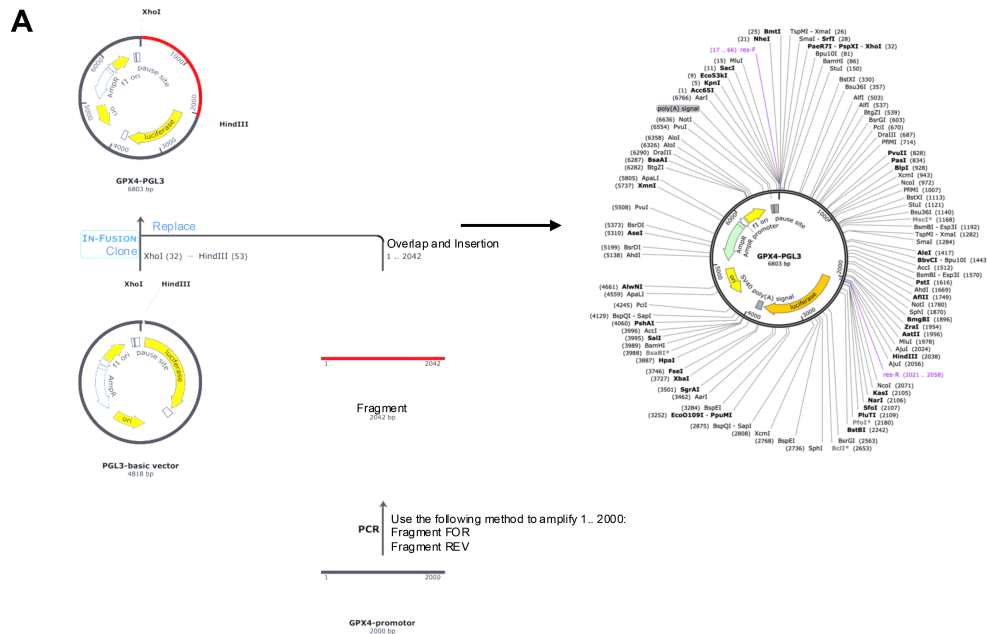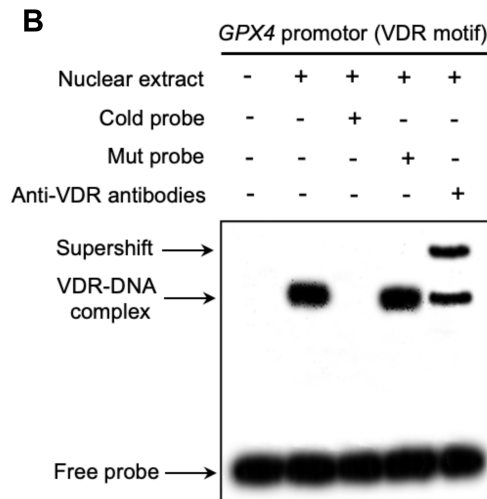

**Fig S3. VDR is a key transcriptional regulator of GPX4.**

(A) Schematic diagram of synthesis of PGL3-GPX4 luc plasmid. (B) Nuclear extracts from HK-2 cells were incubated with anti-VDR antibodies for 15min prior to further incubating with biotin-labeled probes containing VDR motif from GPX4 promoter. The VDR-DNA complexes and supershifts were measured using EMSA.

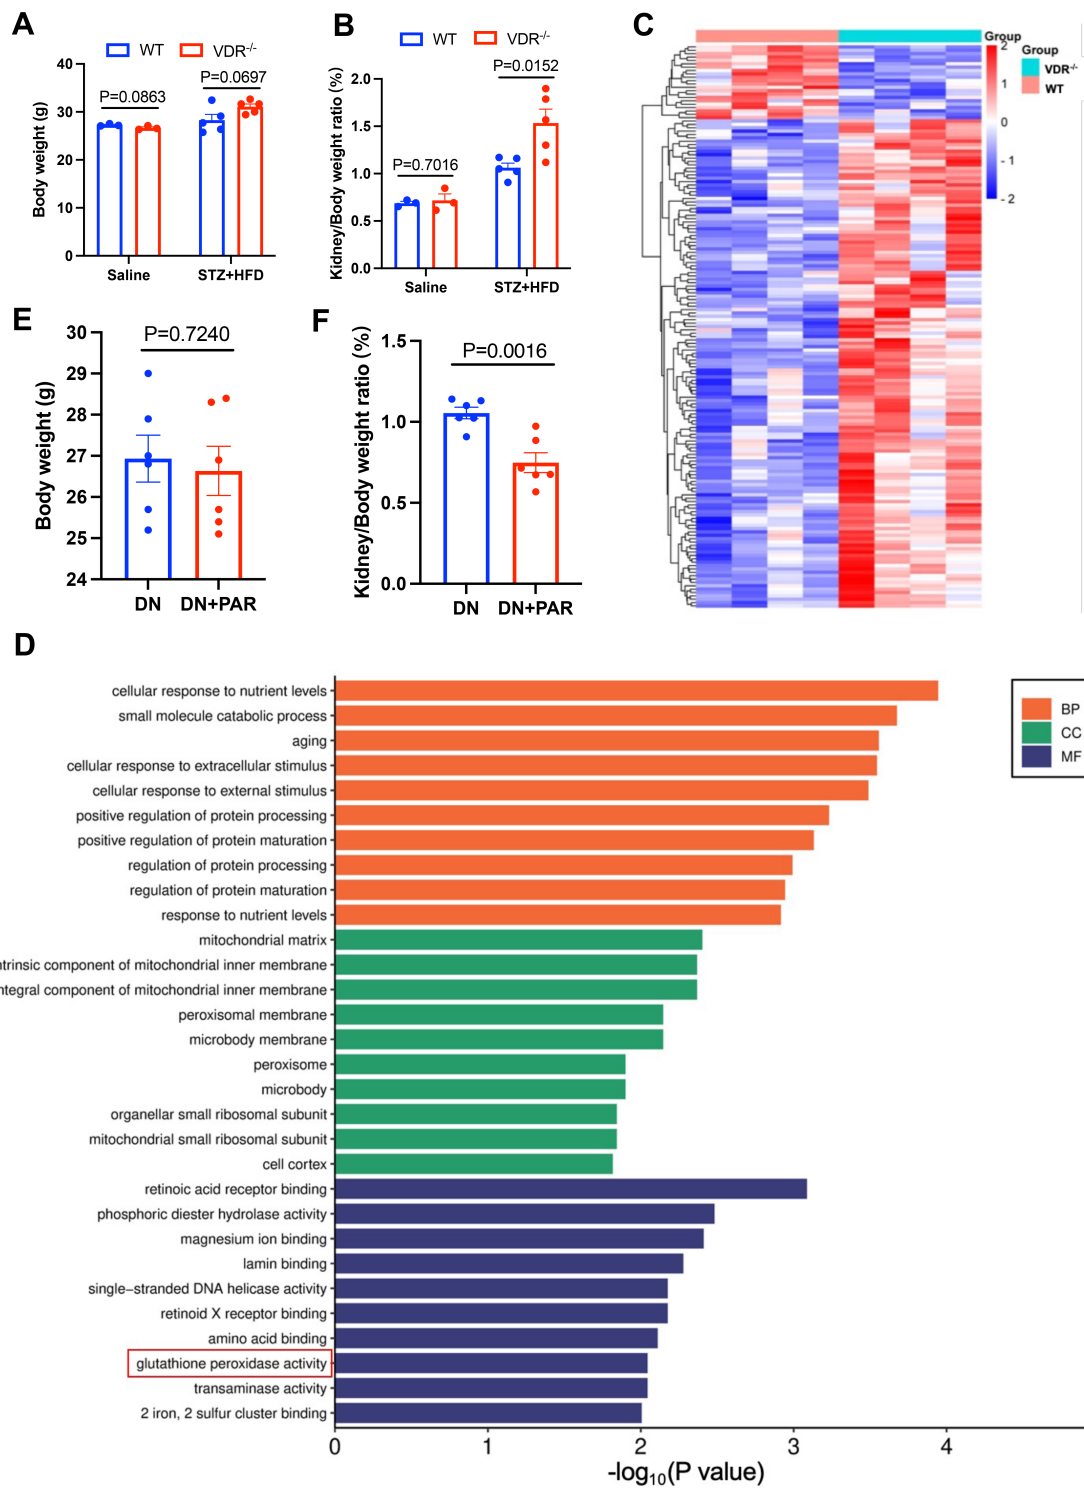

70

71

**Fig S4. VDR deletion promotes ferroptosis to exacerbate renal tubule injury in DN mice.**

(A and B) Levels of body weight and kidney/body weight ratio in mice in the indicated groups (n = 3/5). (C) Heatmap showing the expression of differential genes in the kidney tissues of VDR<sup>-/-</sup> and WT mice treated with STZ and HFD (n = 3). (D) GO enrichment analysis of differentially expressed genes in VDR<sup>-/-</sup> and WT mice treated with STZ and HFD. (E and F) Levels of body weight and kidney/body weight ratio in DN mice treated with PAR or vehicle (n = 6). Data are expressed as means ± SEM. Student's t-test was employed for comparisons between two groups; one-way ANOVA followed by Tukey's post-test for multiple comparisons was used for groups of three or more.

A

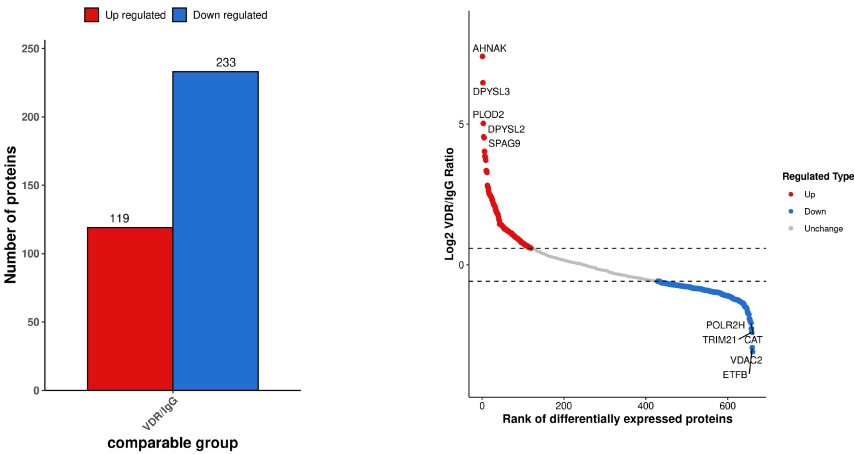

B

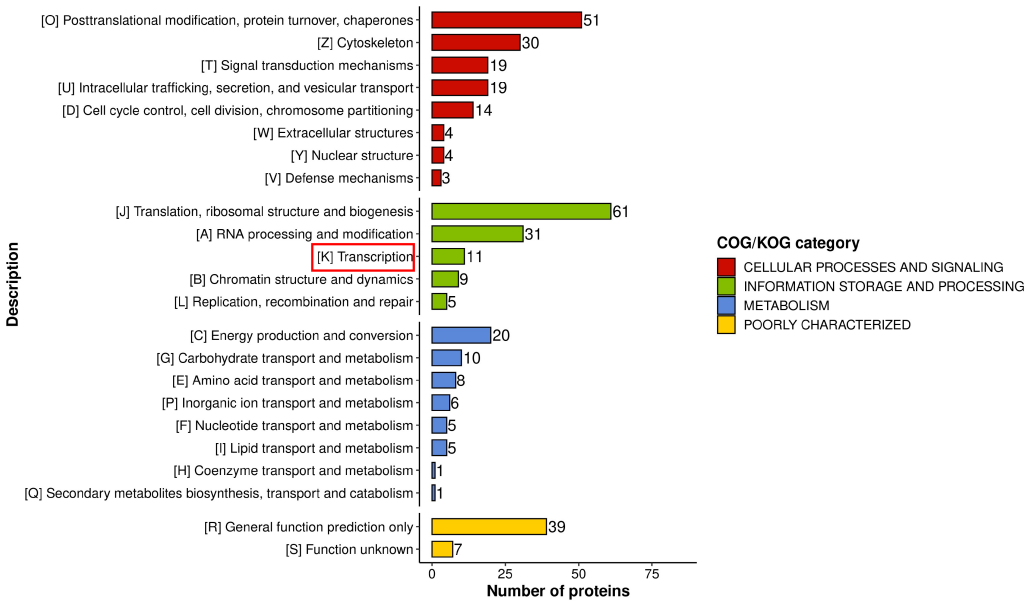

C

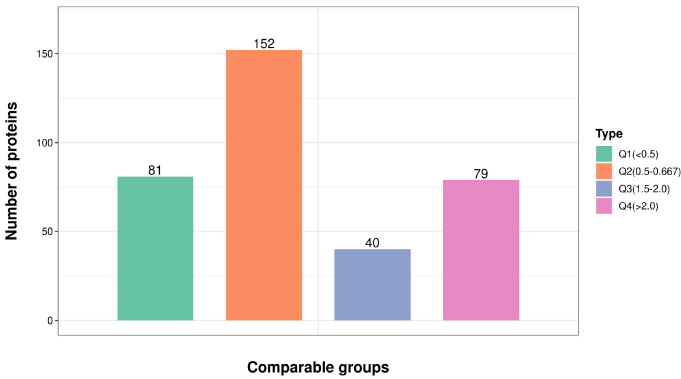

84

85

**Fig S5. E3 ubiquitin ligase PRPF19 mediates ubiquitination degradation of VDR.**

(A) Statistical and scatter plots of differential proteins. (B) Perform COG/KOG classification analysis on the selected differentially expressed proteins. (C) In order to compare the functional similarities and differences between proteins with different expression levels, we divided the proteins into four parts, called Q1 to Q4, based on their differential expression levels, and performed GO, KEGG enrichment, and COG/KOG category analysis on each part.

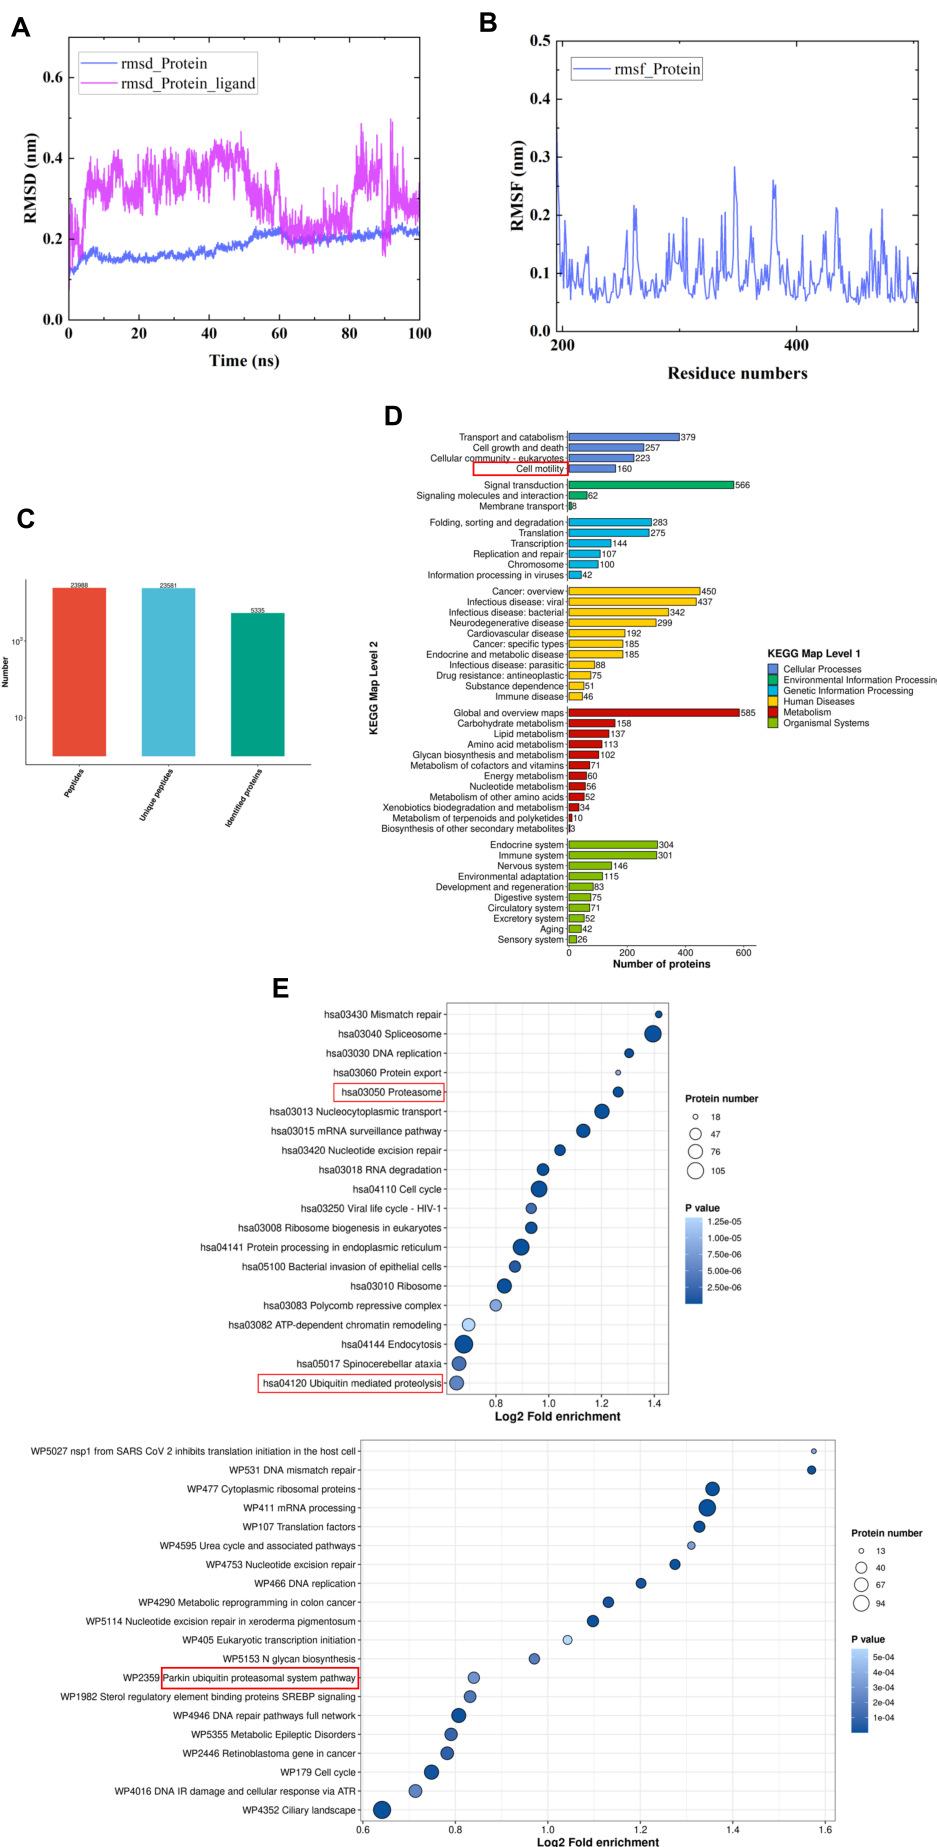



**Fig S6. BBR and VDR competitively bind to PRPF19.**

(A) The plots of RMSD of BBR-PRPF19 complex and free PRFP19. (B) The plots of RMSF of BBR-PRPF19 complex. (C) The overall situation of peptide segments and protein numbers identified in protein group. (D) Perform KEGG pathway classification analysis on identified proteins. (E) Perform WikiPathways pathway enrichment analysis on identified proteins (up), and KEGG pathway analysis of BBR interacting proteins (down).

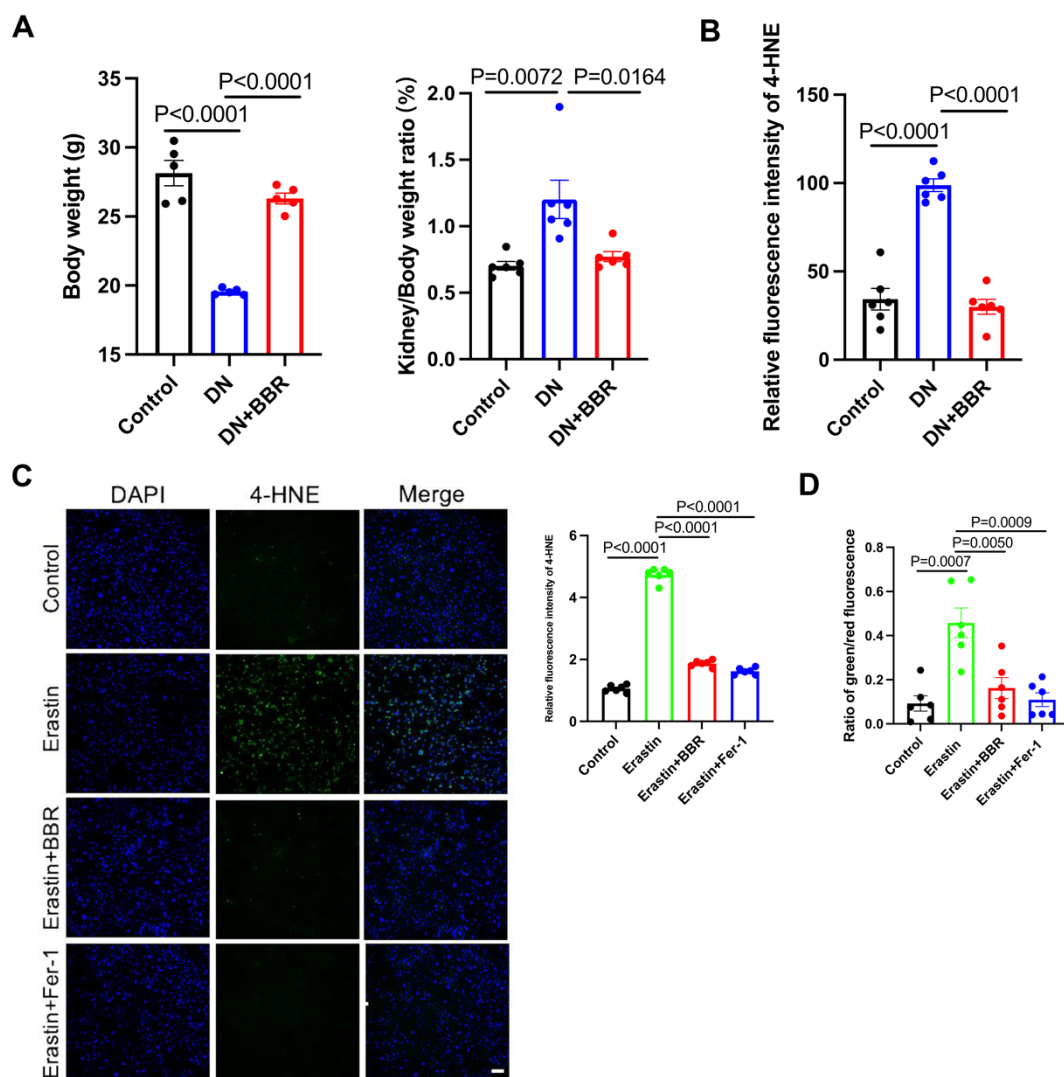

**Fig S7. BBR inhibits ferroptosis of RTECs in vitro and in vivo.**

(A) Levels of body weight and kidney/body weight ratio in DN mice treated with BBR or vehicle for 4 weeks (bar = 5 cm). (B) Analysis results of fluorescence staining of 4-HNE in DN mice treated with BBR or vehicle for 4 weeks (n = 6). (C) Immunofluorescence staining of 4-HNE in HK-2 cells treated with erastin (5  $\mu$ M), BBR (10  $\mu$ M), Fer-1 (5  $\mu$ M) or vehicle (n = 6; bar = 50  $\mu$ m). Data are expressed as means  $\pm$  SEM. Student's t-test was employed for comparisons between two groups; one-way ANOVA followed by Tukey's post-test for multiple comparisons was used for groups of three or more.

113 **Supplementary Table 1. Clinical information of the subjects**

| Characteristics                   | Diabetic Nephropathy<br>( <i>n</i> =40) | Non-Diabetic Nephropathy<br>( <i>n</i> =40) | <i>p</i> value      |
|-----------------------------------|-----------------------------------------|---------------------------------------------|---------------------|
| Age (years)                       | 57.38±8.14                              | 43.76±8.02                                  | 0.0017*             |
| Male (n, %)                       | 29 (72.50%)                             | 25 (52.50%)                                 | 0.1080 <sup>#</sup> |
| SCr (μmol/L)                      | 512.88±153.87                           | 79±13.53                                    | 2e-5*               |
| BUN (mmol/L)                      | 18.16±7.24                              | 4.40±3.38                                   | 0.0010*             |
| GFR (ml/min)                      | 23.10±18.07                             | 97±6.74                                     | 1.3e-8*             |
| Comorbidities/<br>Medical history |                                         |                                             |                     |
| Hypertension                      | 38 (95%)                                | 0                                           |                     |
| Diabetes mellitus                 | 40 (100%)                               | 0                                           |                     |
| Coronary disease                  | 9 (22.50%)                              | 0                                           |                     |
| Neurologic                        | 0                                       | 0                                           |                     |
| Neoplasms (extra-<br>renal)       | 0                                       | 0                                           |                     |

114 #Fisher's two-tailed test. \*Unpaired two-tailed t-test. GFR: Glomerular filtration rate.

115

**Supplementary Table 2. List of primers used for qRT-PCR**

| <b>Gene names</b>            | <b>Primer</b> | <b>Sequence (5' to 3')</b>  |
|------------------------------|---------------|-----------------------------|
| Mouse <i>GPX4</i>            | Forward       | CTCCGGAGACTCCTCCTCAA        |
| Mouse <i>GPX4</i>            | Reversed      | AGCGCAACATGATCACCTCA        |
| Mouse <i>VDR</i>             | Forward       | CCGTCTGAGCCGCTTACTTA        |
| Mouse <i>VDR</i>             | Reversed      | TATCGGGCATGCAGATCGAC        |
| Mouse <i>GAPDH</i>           | Forward       | GAGAGTGTTTCCTCGTCCCG        |
| Mouse <i>GAPDH</i>           | Reversed      | ATCCGTTACACCGACCTTC         |
| Human <i>VDR</i> -Motif 1    | Forward       | TCACACCTGTAATCCCAGCACTCT    |
| Human <i>VDR</i> -Motif 1    | Reversed      | TACACGAGCGAGCCACCACA        |
| Human <i>VDR</i> -Motif 2    | Forward       | GCTGAGGCTGGAGGATCACTTG      |
| Human <i>VDR</i> -Motif 2    | Reversed      | GGACAACAGGCTCATCCACCAT      |
| Human <i>VDR</i> -Motif 3    | Forward       | GGTGACAGACCAAGACTCCTCAA     |
| Human <i>VDR</i> -Motif 3    | Reversed      | GGCAACAGAAACACTCATCTCATACTT |
| Human <i>VDR</i> -Motif 4    | Forward       | ACGCCTCTGTGCTGCATCTG        |
| Human <i>VDR</i> -Motif 4    | Reversed      | GGATTACAGGTGTGAGCCACTCTAC   |
| Human <i>VDR</i> -Motif 5    | Forward       | GCCCTGAGTCTGTCTCTGAAGAAATAC |
| Human <i>VDR</i> -Motif 5    | Reversed      | CAAAGTGCTGGGATTACAGGTGTGA   |
| Human <i>YY1</i> -Motif 1    | Forward       | CGGGAGCAAAGCCATGTGAACA      |
| Human <i>YY1</i> -Motif 1    | Reversed      | AGATGCAGCACAGAGGCGTCAT      |
| Human <i>YY1</i> -Motif 2    | Forward       | GCGTGGTAGCACATGCCTGTA       |
| Human <i>YY1</i> -Motif 2    | Reversed      | GGAAGTGTGCTACCGTGATTGGA     |
| Human <i>YY1</i> -Motif 3    | Forward       | TGTCTTGATGACTCTCAGGTCTCAG   |
| Human <i>YY1</i> -Motif 3    | Reversed      | GAGTGCTGGGATTACAGGTGTGA     |
| Human <i>YY1</i> -Motif 4    | Forward       | TCGCAAGGGCAAGAACAGAGTC      |
| Human <i>YY1</i> -Motif 4    | Reversed      | GCAGAGGCAGTGAAGCAAGGAT      |
| Human <i>YY1</i> -Motif 5    | Forward       | TCTCAGGTCTCAGTGCCACATTA     |
| Human <i>YY1</i> -Motif 5    | Reversed      | TTGCTTCTCATCACAGCTCCATCTT   |
| Human <i>POU2F2</i> -Motif 1 | Forward       | TCTCAGGTCTCAGTGCCACAT       |
| Human <i>POU2F2</i> -Motif 1 | Reversed      | GCCAGGCTGATCTCGAACTCCT      |

---

|                              |          |                           |
|------------------------------|----------|---------------------------|
| Human <i>POU2F2</i> -Motif 2 | Forward  | CTGTGATGAGAAGCAAACCCAACTC |
| Human <i>POU2F2</i> -Motif 2 | Reversed | GGCTGATCTCGAACTCCTGACCT   |
| Human <i>POU2F2</i> -Motif 3 | Forward  | TGAGTCAGGAGAATCGCTTGAACC  |
| Human <i>POU2F2</i> -Motif 3 | Reversed | GCTCATCCACCATTCCTGGCTAAT  |
| Human <i>POU2F2</i> -Motif 4 | Forward  | AACCATCCATGACGCCTCTGTG    |
| Human <i>POU2F2</i> -Motif 4 | Reversed | TGGTCAGGCTGGTCTCGAACTC    |
| Human <i>POU2F2</i> -Motif 5 | Forward  | AGAGACGGGAGGTTTCGCTTGAG   |
| Human <i>POU2F2</i> -Motif 5 | Reversed | CGCAGTTATCCGGCTGGTTGAC    |

---

117

118

119 **Supplementary Table 3. List of antibodies used in this study**

| Antibody                        | Source | Supplier       | Catalog number |
|---------------------------------|--------|----------------|----------------|
| VDR                             | Rabbit | Abcam          | ab109234       |
| VDR                             | Mouse  | Proteintech    | 67192-1-Ig     |
| GPX4                            | Mouse  | Proteintech    | 67763-1-Ig     |
| PRPF19                          | Rabbit | Proteintech    | 15414-1-AP     |
| FTH1                            | Rabbit | ABclonal       | A19544         |
| ACSL4                           | Rabbit | Proteintech    | 22401-1-AP     |
| TfR1                            | Rabbit | ABclonal       | A5865          |
| 4-HNE                           | Rabbit | Bioss          | bs-6313R       |
| YY1                             | Rabbit | Cell Signaling | 46395S         |
| POU2F2                          | Rabbit | BOSTER         | M04407-2       |
| Anti-MYC tag mAb                | Rabbit | Proteintech    | 16286-1-AP     |
| Anti-FLAG tag mAb               | Mouse  | Proteintech    | 66008-4-Ig     |
| Anti-Ubiquitin mAb              | Mouse  | ThermoFisher   | 13-1600        |
| FITC Goat Anti-Rabbit IgG (H+L) | Goat   | BOSTER         | BA1032         |
| FITC Goat Anti-Rabbit IgG (H+L) | Goat   | ABclonal       | AS011          |
| CY3 Goat Anti-Rabbit IgG(H+L)   | Goat   | BOSTER         | BA1105         |
| $\beta$ -actin                  | Mouse  | Proteintech    | 66009-1-Ig     |

120

121

122
